# Supplementary material
Source: MDPI journal article supplement (https://www.mdpi.com/2079-6412/13/9/1518)
Supplement: s1 [file s1 › coatings-2543900-supplementary.pdf]

## Article

# Supplementary Materials: Comparative Analysis of Performance of Water-Based Coatings Prepared by Two Kinds of Anti-Bacterial Microcapsules and Nano-Silver Solution on the Surface of Andoung Wood

Yuming Zou <sup>1,2</sup>, Pan Pan <sup>1,2</sup> and Xiaoxing Yan <sup>1,2,\*</sup>

<sup>1</sup> Co-Innovation Center of Efficient Processing and Utilization of Forest Resources, Nanjing Forestry University, Nanjing 210037, China; zou\_yuming@njfu.edu.cn (Y.Z.), pan@njfu.edu.cn (P.P.)

<sup>2</sup> College of Furnishings and Industrial Design, Nanjing Forestry University, Nanjing 210037, China

\* Correspondence: yanxiaoxing@njfu.edu.cn

The materials for the test are shown in Table S1.

**Table S1.** List of experimental material information.

| Material                     | Manufacturer                                                         |
|------------------------------|----------------------------------------------------------------------|
| Andoung wood                 | Guangdong Yihua Wood Industry Co., Ltd., Shantou, China              |
| Nano-silver solution         | Tianjin Beichen Founder Reagent Factory, Tianjin, China              |
| Urea                         | Fuchen Chemical Reagent Co., Ltd., Tianjin, China                    |
| 37.0% formaldehyde           | Nantong Yaixin Chemical Co., Ltd., Nantong, China                    |
| Triethanolamine              | Shaanxi Panlong Yihai Pharmaceutical Co., Ltd., Xi'an, China         |
| Citric acid monohydrate      | Nanjing Quanlong Biotechnology Co., Ltd., Nanjing, China             |
| Tween-80                     | Wuxi Yatai United Chemical Co., Ltd., Wuxi, China                    |
| Span-80                      | Shandong Zibo Haijie Chemical Co., Ltd., Zibo, China                 |
| Absolute ethanol             | Guangzhou Kema Chemical Technology Co., Ltd., Guangzhou, China       |
| Chitosan                     | Shanghai National Medicine Reagent Co., Ltd., Shanghai, China        |
| Acetic acid                  | Shanghai National Medicine Reagent Co., Ltd., Shanghai, China        |
| Melamine                     | Shandong Yousuo Chemical Industry Technology Co., Ltd., Linyi, China |
| Nutrient Agar                | Qingdao Hope Bio-Technology Co., Ltd., Qingdao, China                |
| Nutritious Broth             | Qingdao Hope Bio-Technology Co., Ltd., Qingdao, China                |
| Water-based primer           | Akzo Nobel Paint Co., Ltd., Guangzhou, China                         |
| Water-based top coat         | Akzo Nobel Paint Co., Ltd., Guangzhou, China                         |
| <i>Staphylococcus aureus</i> | Beijing Conservation Biotechnology Co., Ltd., Beijing, China         |
| <i>Escherichia coli</i>      | Beijing Conservation Biotechnology Co., Ltd., Beijing, China         |
| Eluent                       | Sichuan Kelun Pharmaceutical Co., Ltd., Chengdu, China               |
| Red ink                      | Guangzhou Hero Hailuo Cultural Products Co., Ltd., Guangzhou, China  |
| Ethanol (medical grade)      | Shandong Elimokang Medical Supplies Co., Ltd., Qingdao, China        |

The results of tests were assessed in terms of the statistical significance of the difference concerning the kinds of antibacterial agents for the coating, aging time for the coating, or aging method for the coating, respectively. The non-repeated two-way ANOVA method was used for significance analysis. The analysis of variance at a significance level of 0.05 was performed to detect significant differences in coating properties.

In Tables S2–S17, SS is the sum of squares from the mean square, representing the sum of squares between groups and within groups;  $d_f$  is the degree of freedom, and MS is the mean square obtained by dividing the sum of squares by the degrees of freedom. F represents the test statistic, which is used to calculate the hypothesis test.  $P_{\text{value}}$  indicates the level of significance, which is used to evaluate the range and interval of overall parameters and calculate the probability of a possible experiment.  $F_{\text{crit}}$  represents the F value at the corresponding significant level. When F is less than  $F_{\text{crit}}$ , there is no difference between the two groups of data. The criterion for judging the significance of the difference is that if  $0.01 < P_{\text{value}} < 0.05$ , the difference is significant. If  $P_{\text{value}} \leq 0.01$ , the difference is very significant. If  $P_{\text{value}} > 0.05$ , there is no difference. The results obtained by the above methods are  $F > F_{\text{crit}}$  and  $P_{\text{value}} < 0.01$ .

As shown in Table S2, there is a significant difference for the anti-bacterial properties toward the *Staphylococcus aureus* of the coating. As shown in Table S3, it shows no difference for the anti-bacterial properties toward the *Escherichia coli* of the coating. As shown in Tables S4–S6, it shows a significant difference for the coating gloss. As shown in Table S7, it shows a significant difference for the coating adhesion. As shown in Tables S8–S10, after high-temperature accelerated aging, there is only a significant difference for the chromatic aberration of the coating with CS-AgNPS@MF. As shown in Tables S11–S13, for the liquid resistance of the coating, there is a significant difference for the red ink. After liquid resistance and high-temperature accelerated aging, the chromatic aberration of the coating shows no difference, as shown in Table S14. For the anti-bacterial property toward *Escherichia coli*, three kinds of anti-bacterial coating after high-temperature accelerated aging show a significant difference, as shown in Table S15. For the anti-bacterial property toward *Staphylococcus aureus*, three kinds of the anti-bacterial coating after high-temperature accelerated aging show a significant difference, as shown in Table S16. As shown in Table S17, there is a significant difference for the anti-bacterial properties toward *Escherichia coli* of the coating with AgNPS@UF before aging, after high-temperature accelerated aging, and after UV aging, respectively.

**Table S2.** Significance analysis of anti-bacterial properties toward the *Staphylococcus aureus* of the coating.

| Difference source    | SS          | $d_f$ | MS          | F           | $P_{\text{value}}$ | $F_{\text{crit}}$ |
|----------------------|-------------|-------|-------------|-------------|--------------------|-------------------|
| content              | 0.0217387   | 6     | 0.003623117 | 0.756944348 | 0.616584552        | 2.996120378       |
| anti-bacterial agent | 0.211701548 | 2     | 0.105850774 | 22.11442626 | 0.000094           | 3.885293835       |
| error                | 0.057438039 | 12    | 0.004786503 |             |                    |                   |
| total                | 0.290878287 | 20    |             |             |                    |                   |

**Table S3.** Significance analysis of anti-bacterial properties toward the *Escherichia coli* of the coating.

| Difference source    | SS          | $d_f$ | MS          | F           | $P_{\text{value}}$ | $F_{\text{crit}}$ |
|----------------------|-------------|-------|-------------|-------------|--------------------|-------------------|
| content              | 0.005224871 | 6     | 0.000870812 | 0.686196613 | 0.664909433        | 2.996120378       |
| anti-bacterial agent | 0.005595313 | 2     | 0.002797657 | 2.204543351 | 0.152961107        | 3.885293835       |
| error                | 0.015228496 | 12    | 0.001269041 |             |                    |                   |
| total                | 0.026048681 | 20    |             |             |                    |                   |

**Table S4.** Significance analysis of 20° gloss of anti-bacterial coatings.

| Difference source    | SS          | df | MS          | F           | P <sub>value</sub> | F <sub>crit</sub> |
|----------------------|-------------|----|-------------|-------------|--------------------|-------------------|
| content              | 287.07625   | 7  | 41.01089286 | 7.943449087 | 0.000556157        | 2.764199257       |
| anti-bacterial agent | 170.4133333 | 2  | 85.20666667 | 16.50378159 | 0.000207837        | 3.738891832       |
| error                | 72.28       | 14 | 5.162857143 |             |                    |                   |
| total                | 529.7695833 | 23 |             |             |                    |                   |

**Table S5.** Significance analysis of 60° gloss of anti-bacterial coatings.

| Difference source    | SS          | df | MS          | F           | P <sub>value</sub> | F <sub>crit</sub> |
|----------------------|-------------|----|-------------|-------------|--------------------|-------------------|
| content              | 516.5783333 | 7  | 73.79690476 | 5.327907107 | 0.003869813        | 2.764199257       |
| anti-bacterial agent | 950.0258333 | 2  | 475.0129167 | 34.29445588 | 0.000004           | 3.738891832       |
| error                | 193.9141667 | 14 | 13.8510119  |             |                    |                   |
| total                | 1660.518333 | 23 |             |             |                    |                   |

**Table S6.** Significance analysis of 85° gloss of anti-bacterial coatings.

| Difference source    | SS          | df | MS          | F           | P <sub>value</sub> | F <sub>crit</sub> |
|----------------------|-------------|----|-------------|-------------|--------------------|-------------------|
| content              | 1165.178333 | 7  | 166.4540476 | 2.132924306 | 0.107875718        | 2.764199257       |
| anti-bacterial agent | 3032.655833 | 2  | 1516.327917 | 19.43006322 | 0.000091           | 3.738891832       |
| error                | 1092.564167 | 14 | 78.04029762 |             |                    |                   |
| total                | 5290.398333 | 23 |             |             |                    |                   |

**Table S7.** Significance analysis of the coating adhesion.

| Difference source    | SS          | df | MS          | F        | P <sub>value</sub> | F <sub>crit</sub> |
|----------------------|-------------|----|-------------|----------|--------------------|-------------------|
| content              | 15.29166667 | 7  | 2.18452381  | 5.734375 | 0.002761596        | 2.764199257       |
| anti-bacterial agent | 28          | 2  | 14          | 36.75    | 0.000003           | 3.738891832       |
| error                | 5.333333333 | 14 | 0.380952381 |          |                    |                   |
| total                | 48.625      | 23 |             |          |                    |                   |

**Table S8.** Significance analysis of chromatic aberration of the coating after high-temperature accelerated aging with AgNPS@UF.

| Difference source | SS          | df | MS          | F           | P <sub>value</sub> | F <sub>crit</sub> |
|-------------------|-------------|----|-------------|-------------|--------------------|-------------------|
| content           | 188.4908903 | 6  | 31.41514839 | 16.30361784 | 0.000039156        | 2.996120378       |
| aging time        | 13.01592444 | 2  | 6.507962222 | 3.377457515 | 0.068611493        | 3.885293835       |
| error             | 23.12258446 | 12 | 1.926882039 |             |                    |                   |
| total             | 224.6293992 | 20 |             |             |                    |                   |

**Table S9.** Significance analysis of chromatic aberration of the coating after high-temperature accelerated aging with CS-AgNPS@MF.

| Difference source | SS          | df | MS          | F           | P <sub>value</sub> | F <sub>crit</sub> |
|-------------------|-------------|----|-------------|-------------|--------------------|-------------------|
| content           | 105.082072  | 6  | 17.51367866 | 1.493808968 | 0.260536476        | 2.996120378       |
| aging time        | 492.4579029 | 2  | 246.2289515 | 21.00181366 | 0.000120379        | 3.885293835       |
| error             | 140.6901073 | 12 | 11.72417561 |             |                    |                   |
| total             | 738.2300822 | 20 |             |             |                    |                   |

**Table S10.** Significance analysis of chromatic aberration of the coating after high-temperature accelerated aging with nano-silver solution.

| Difference source | SS          | df | MS          | F           | P <sub>value</sub> | F <sub>crit</sub> |
|-------------------|-------------|----|-------------|-------------|--------------------|-------------------|
| content           | 17.58152731 | 6  | 2.930254551 | 3.075692139 | 0.046213065        | 2.996120378       |
| aging time        | 6.414448243 | 2  | 3.207224121 | 3.366408565 | 0.069098547        | 3.885293835       |
| error             | 11.4325664  | 12 | 0.952713867 |             |                    |                   |
| total             | 35.42854195 | 20 |             |             |                    |                   |

**Table S11.** Significance analysis of liquid resistance toward red ink of the coating.

| Difference source    | SS          | df | MS          | F           | P <sub>value</sub> | F <sub>crit</sub> |
|----------------------|-------------|----|-------------|-------------|--------------------|-------------------|
| content              | 13.33333333 | 7  | 1.904761905 | 5.423728814 | 0.003568945        | 2.764199257       |
| anti-bacterial agent | 25.08333333 | 2  | 12.54166667 | 35.71186441 | 0.000003           | 3.738891832       |
| error                | 4.916666667 | 14 | 0.351190476 |             |                    |                   |
| total                | 43.33333333 | 23 |             |             |                    |                   |

**Table S12.** Significance analysis of liquid resistance toward detergent of the coating.

| Difference source    | SS          | df | MS          | F           | P <sub>value</sub> | F <sub>crit</sub> |
|----------------------|-------------|----|-------------|-------------|--------------------|-------------------|
| content              | 14.95833333 | 7  | 2.136904762 | 8.756097561 | 0.000333927        | 2.764199257       |
| anti-bacterial agent | 0.583333333 | 2  | 0.291666667 | 1.195121951 | 0.331740378        | 3.738891832       |
| error                | 3.416666667 | 14 | 0.244047619 |             |                    |                   |
| total                | 18.95833333 | 23 |             |             |                    |                   |

**Table S13.** Significance analysis of liquid resistance toward ethanol of the coating.

| Difference source    | SS | df | MS | F     | P <sub>value</sub> | F <sub>crit</sub> |
|----------------------|----|----|----|-------|--------------------|-------------------|
| content              | 0  | 7  | 0  | 65535 | DBZ                | 2.764199257       |
| anti-bacterial agent | 0  | 2  | 0  | 65535 | DBZ                | 3.738891832       |
| error                | 0  | 14 | 0  |       |                    |                   |
| total                | 0  | 23 |    |       |                    |                   |

**Table S14.** Significance analysis of chromatic aberration of the coating after liquid resistance and after high-temperature accelerated aging.

| Difference source    | SS          | df | MS          | F           | P <sub>value</sub> | F <sub>crit</sub> |
|----------------------|-------------|----|-------------|-------------|--------------------|-------------------|
| content              | 409.170352  | 6  | 68.19505866 | 5.259303025 | 0.007158934        | 2.996120378       |
| anti-bacterial agent | 10.6993312  | 2  | 5.349665598 | 0.412574064 | 0.670985504        | 3.885293835       |
| error                | 155.5986982 | 12 | 12.96655818 |             |                    |                   |
| total                | 575.4683813 | 20 |             |             |                    |                   |

**Table S15.** Significance analysis of the anti-bacterial property toward *Escherichia coli* of the coating after high-temperature accelerated aging.

| Difference source    | SS          | df | MS          | F           | P <sub>value</sub> | F <sub>crit</sub> |
|----------------------|-------------|----|-------------|-------------|--------------------|-------------------|
| content              | 0.026522906 | 6  | 0.004420484 | 1.669758182 | 0.211660735        | 2.996120378       |
| anti-bacterial agent | 0.465923032 | 2  | 0.232961516 | 87.99700838 | 0.00000007         | 3.885293835       |
| error                | 0.031768559 | 12 | 0.00264738  |             |                    |                   |
| total                | 0.524214498 | 20 |             |             |                    |                   |

**Table S16.** Significance analysis of the anti-bacterial property toward *Staphylococcus aureus* of the coating after high-temperature accelerated aging.

| Difference source    | SS          | df | MS          | F           | P <sub>value</sub> | F <sub>crit</sub> |
|----------------------|-------------|----|-------------|-------------|--------------------|-------------------|
| content              | 0.035792943 | 6  | 0.00596549  | 0.563313234 | 0.751919636        | 2.996120378       |
| anti-bacterial agent | 0.438139327 | 2  | 0.219069663 | 20.68645355 | 0.00012917         | 3.885293835       |
| error                | 0.12708007  | 12 | 0.010590006 |             |                    |                   |
| total                | 0.601012339 | 20 |             |             |                    |                   |

**Table S17.** Significance analysis of the anti-bacterial properties toward *Escherichia coli* of the coating with AgNPS@UF before aging, after the high-temperature accelerated aging, and after the UV aging.

| Difference source | SS          | df | MS          | F           | P <sub>value</sub> | F <sub>crit</sub> |
|-------------------|-------------|----|-------------|-------------|--------------------|-------------------|
| content           | 0.014758411 | 6  | 0.002459735 | 3.31277359  | 0.03673298         | 2.996120378       |
| aging method      | 0.295169814 | 2  | 0.147584907 | 198.7674846 | 0.0000000006       | 3.885293835       |
| error             | 0.008910003 | 12 | 0.0007425   |             |                    |                   |
| total             | 0.318838228 | 20 |             |             |                    |                   |
